# Supplementary material for: Bistable electrical switching and nonvolatile memory effects by doping different amounts of GO in poly(9,9-dioctylfluorene-2,7-diyl)
Source: Royal Society of Chemistry journal article supplement (doi:10.1039/c8ra00029h), 2018-01-01
Supplement: c8ra00029h1.pdf [file c8ra00029h1.pdf]

**Bistable electrical switching and nonvolatile memory effect by doping different  
content of GO in Poly (9,9-dioctylfluorene-2,7-diyl)**

Ying Xin<sup>a</sup>, Xiaofeng Zhao<sup>b</sup>, Xiankai Jiang<sup>a</sup>, Qun Yang<sup>a</sup>, Jiahe Huang<sup>a</sup>, Shuhong  
Wang<sup>a\*</sup>, Rongrong Zheng<sup>a</sup>, Cheng Wang<sup>a, c\*</sup>, Yanjun Hou<sup>a</sup>

<sup>a</sup> School of Chemical Engineering and Materials, Heilongjiang University, Harbin  
150080, P. R. China

<sup>b</sup> School of electronic engineering, Heilongjiang University, Harbin 150080, P. R.  
China

<sup>c</sup> Key Laboratory of Functional Inorganic Material Chemistry, (Heilongjiang  
University), Ministry of Education, Harbin 150080, P. R. China

Corresponding author: Shuhong Wang, e-mail: openair@163.com, Cheng Wang,  
e-mail: wangc\_93@163.com

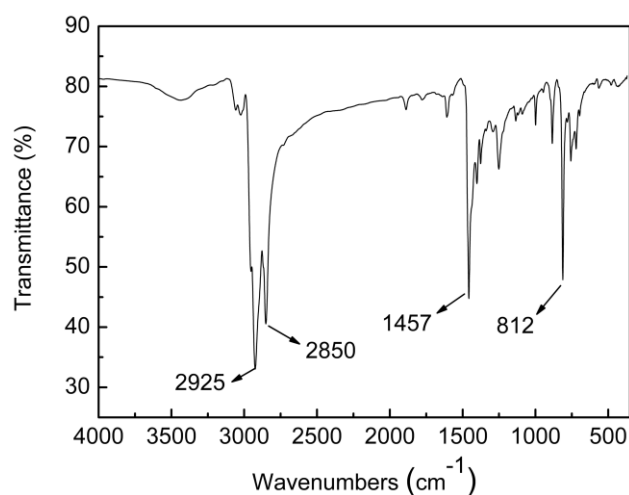

Figure S1 The FT-IR spectra of PFO

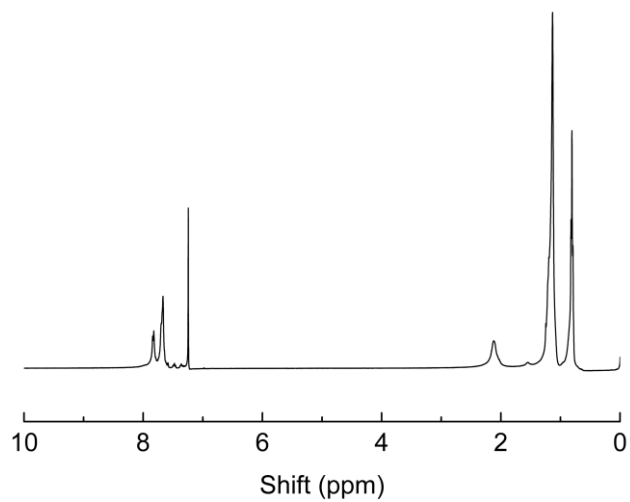

Figure S2 <sup>1</sup>H spectra of PFO in CDCl<sub>3</sub>

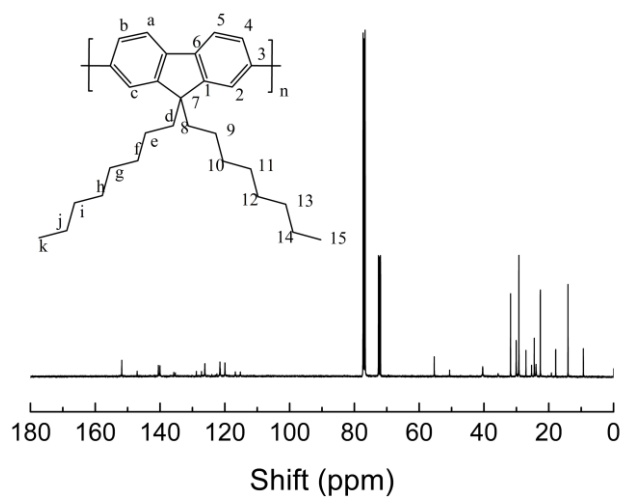

Figure S3 <sup>13</sup>C NMR spectra of PFO in CDCl<sub>3</sub>
